# Supplementary material
Source: Research Square preprint supplement (doi:10.21203/rs.3.rs-9711275/v1)
Supplement: Supplementary file 1 [file f865a4f4ea81cbaae063a2a6.docx]

**7. Supplementary material**
**7.1 Extended formula for Coefficient of Variation (CV)**

**7.2 Extended formula for Weber slope**

*m: Weber Slope.*

***n****: total number of target time intervals (6).*

*: mean produced time corresponding to each target time interval.*

*: mean of the target time intervals.*

***​****: standard deviation of the produced times corresponding to each target time interval (xi).*

**​**: mean of the standard deviations.
